# Supplementary material for: Determination of biomarkers associated with neoadjuvant treatment response focusing on colibactin-producing Escherichia coli in patients with mid or low rectal cancer: a prospective clinical study protocol (MICARE)
Source: PubMed Central journal article supplement — BMJ Open. 2022 Dec 2;12(12):e061527. doi: 10.1136/bmjopen-2022-061527 (PMC9723882; doi:10.1136/bmjopen-2022-061527), 2022-12-02
Supplement: bmjopen-2022-061527supp002.pdf [file bmjopen-2022-061527supp002.pdf]

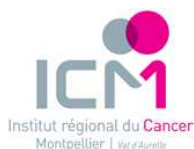

## Formulaire de consentement

### Détermination de facteurs Microbiologiques associés à une mauvaise réponse au traitement néoadjuvant dans les Cancers du REctum : focus sur les Escherichia coli productrices de cyclomodulines MICARE

Version 4.0 du 23/02/2021

**Promoteur:** Institut du Cancer de Montpellier ICM, Parc Euromédecine, 208 rue des Apothicaires, 34298 Montpellier Cedex 5

**Coordonnateur de l'étude:** Pr Philippe ROUANET Département de Chirurgie Oncologique, ICM

**Je soussigné(e) :**

**Nom:**..... **Prénom:**.....

**Date de naissance:** |\_|\_|\_|\_|\_|\_|\_|\_|\_|\_|\_|\_|\_|\_|\_|\_|

**certifie avoir lu et compris la note d'information version n°4.0 du 23/02/2021 qui m'a été remise et accepte de participer à cette recherche selon les conditions définies dans la note d'information.**

J'ai bien compris que ma participation à la recherche était libre et volontaire, et que je pouvais refuser d'y participer sans avoir à me justifier, tout en continuant à bénéficier des meilleurs soins disponibles.

Je reconnais avoir pu poser toutes les questions souhaitées et avoir reçu des réponses satisfaisantes à mes questions.

Je reconnais en particulier que le droit à me faire assister par une personne de mon choix m'a été communiqué.

Je reconnais avoir disposé d'un temps de réflexion suffisant entre ces informations et le présent consentement et avoir eu si je le souhaitais l'opportunité d'en discuter avec mon médecin ou mes proches.

Les conditions de ma participation, notamment la durée de celle-ci, les contraintes, les objectifs, le déroulement de l'étude ainsi que les bénéfices et les risques éventuels, m'ont été expliqués clairement par le Dr/Pr.....

Je m'engage à suivre les contraintes expliquées dans le document d'information, à la fois pour minimiser les risques et pour la bonne réalisation de l'étude. Ma participation à l'étude pourrait être suspendue si je ne respectais pas le protocole.

J'ai compris également que je pouvais à tout moment interrompre ma participation à cette recherche, sans avoir à me justifier, sans aucun préjudice et en continuant à recevoir les meilleurs soins disponibles. Dans ce cas, je m'engage à prévenir le médecin responsable de l'étude.

Je reconnais avoir été informé(e) que l'étude pouvait être interrompue à tout moment sur décision du promoteur ou des autorités de santé, et que toutes les mesures seraient prises dans ce cas pour assurer ma sécurité et la poursuite de ma prise en charge médicale.

J'ai bien compris que tout fait nouveau susceptible de remettre en cause mon consentement à ma participation à l'étude me serait communiqué.

J'ai bien noté que mon consentement ne dégageait pas les médecins et le promoteur de leurs responsabilités, et que je conservais tous les droits qui me sont garantis par la loi.

Formulaire de consentement V 4.0 du 23/02/2021 du protocole MICARE

Réf interne ICM : ICM-ENR-522 Version : 001 Date d'application : 15/05/2017 Page 1 sur 2



## Formulaire de consentement

J'ai bien pris note que la lettre d'information et le consentement sont le fondement juridique pour le traitement des données dans le cadre de cette étude.

J'ai bien noté que, conformément aux dispositions de la loi relative à l'informatique, aux fichiers et aux libertés et au règlement européen 2016/679 sur la protection des données je dispose d'un droit d'accès de rectification, ainsi qu'un droit à l'effacement, à la limitation du traitement et à la portabilité des données (RGPD). Je dispose également d'un droit d'opposition à la transmission des données couvertes par le secret professionnel susceptibles d'être utilisées dans le cadre de cette recherche et d'être traitées.

J'ai bien noté que, si je souhaite me retirer de l'étude, les données recueillies avant mon retrait ne pourront pas être supprimées. Par contre, aucune nouvelle donnée ne sera recueillie. Ces droits s'exercent auprès du médecin qui me suit dans le cadre de cette recherche et qui connaît mon identité.

J'ai pris connaissance que cette recherche a reçu l'avis favorable du Comité de Protection des Personnes de nom du CPP (catégories 1, 2 et 3) et l'information de l'ANSM.

Je reconnais avoir été informé(e) que le promoteur de l'étude, l'Institut régional du Cancer Montpellier a souscrit une assurance de responsabilité civile en cas de préjudice auprès de la société SHAM (contrat n° 140474).

J'autorise dans la mesure où elles sont indispensables aux fins de la recherche, l'enregistrement de données personnelles me concernant. Je sais que le promoteur s'engage à ce que ces données soient rendues confidentielles par un codage sans mention du nom et du prénom.

J'ai bien noté que j'ai le droit d'être informé(e) des résultats globaux de cette recherche selon les modalités qui ont été précisées dans le document d'information.

J'atteste être affilié(e) ou bénéficiaire d'un régime français d'assurance maladie (sécurité sociale), condition obligatoire pour pouvoir être inclus dans la recherche.

J'accepte que les prélèvements biologiques et les données associées soient traités, collectés et conservés dans une collection spécifique de l'étude et utilisés à des fins de recherche.

Je suis informé(e) de la possibilité qu'une partie des prélèvements effectués à l'occasion de ce protocole de recherche soit conservée pour une utilisation ultérieure à des fins de recherche. J'ai également été informé(e) de mon droit à m'opposer à cette conservation et l'utilisation.

|                          |                                                                                                                                                            |
|--------------------------|------------------------------------------------------------------------------------------------------------------------------------------------------------|
| <input type="checkbox"/> | J'accepte que mes données cliniques soient utilisées pour des recherches ultérieures, en France ou dans l'Union Européenne                                 |
| <input type="checkbox"/> | J'accepte que mes prélèvements soient utilisés pour des recherches ultérieures sur le cancer, en France ou dans l'Union Européenne, ayant la même finalité |

Nom du patient :

Nom de l'investigateur :

Date :

Date :

Signature :

Signature :

**Je reconnais qu'un des deux exemplaires de ce formulaire attestant mon consentement m'a été remis.**

Formulaire de consentement V 4.0 du 23/02/2021 du protocole MICARE

Réf interne ICM : ICM-ENR-522 Version : 001 Date d'application : 15/05/2017 Page 2 sur 2
