# Supplementary material for: Determination of biomarkers associated with neoadjuvant treatment response focusing on colibactin-producing Escherichia coli in patients with mid or low rectal cancer: a prospective clinical study protocol (MICARE)
Source: PubMed Central journal article supplement — BMJ Open. 2022 Dec 2;12(12):e061527. doi: 10.1136/bmjopen-2022-061527 (PMC9723882; doi:10.1136/bmjopen-2022-061527), 2022-12-02
Supplement: bmjopen-2022-061527supp003.pdf [file bmjopen-2022-061527supp003.pdf]

| TREATMENT                 | EVENTS                       | YES/NO |
|---------------------------|------------------------------|--------|
| <b>CHEMO-RADIOTHERAPY</b> | Proctitis                    | YES/NO |
|                           | Perineal skin toxicity       | YES/NO |
|                           | Weakness                     | YES/NO |
|                           | Nausea                       | YES/NO |
|                           | Diarrhea                     | YES/NO |
|                           | Abdominal pain               | YES/NO |
|                           | Hematologic toxicity         | YES/NO |
|                           | Hand-foot syndrome           | YES/NO |
| <b>SURGERY</b>            | <b><u>Per-operative</u></b>  |        |
|                           | Bleeding                     | YES/NO |
|                           | Intestinal perforation       | YES/NO |
|                           | Vascular wound               | YES/NO |
|                           | <b><u>Post-operative</u></b> |        |
|                           | Infection                    | YES/NO |
|                           | Anastomotic leakage          | YES/NO |
|                           | Colon ischemia               | YES/NO |
|                           | Bowel obstruction            | YES/NO |
|                           | Bleeding                     | YES/NO |
| Urinary dysfunction       | YES/NO                       |        |
